# Supplementary figures and images for: Phylogeny and Cryptic Diversity of Diopatra (Onuphidae, Annelida) in the East Atlantic
Source: MDPI journal article supplement (doi:10.3390/biology11020327), 2022-02-18

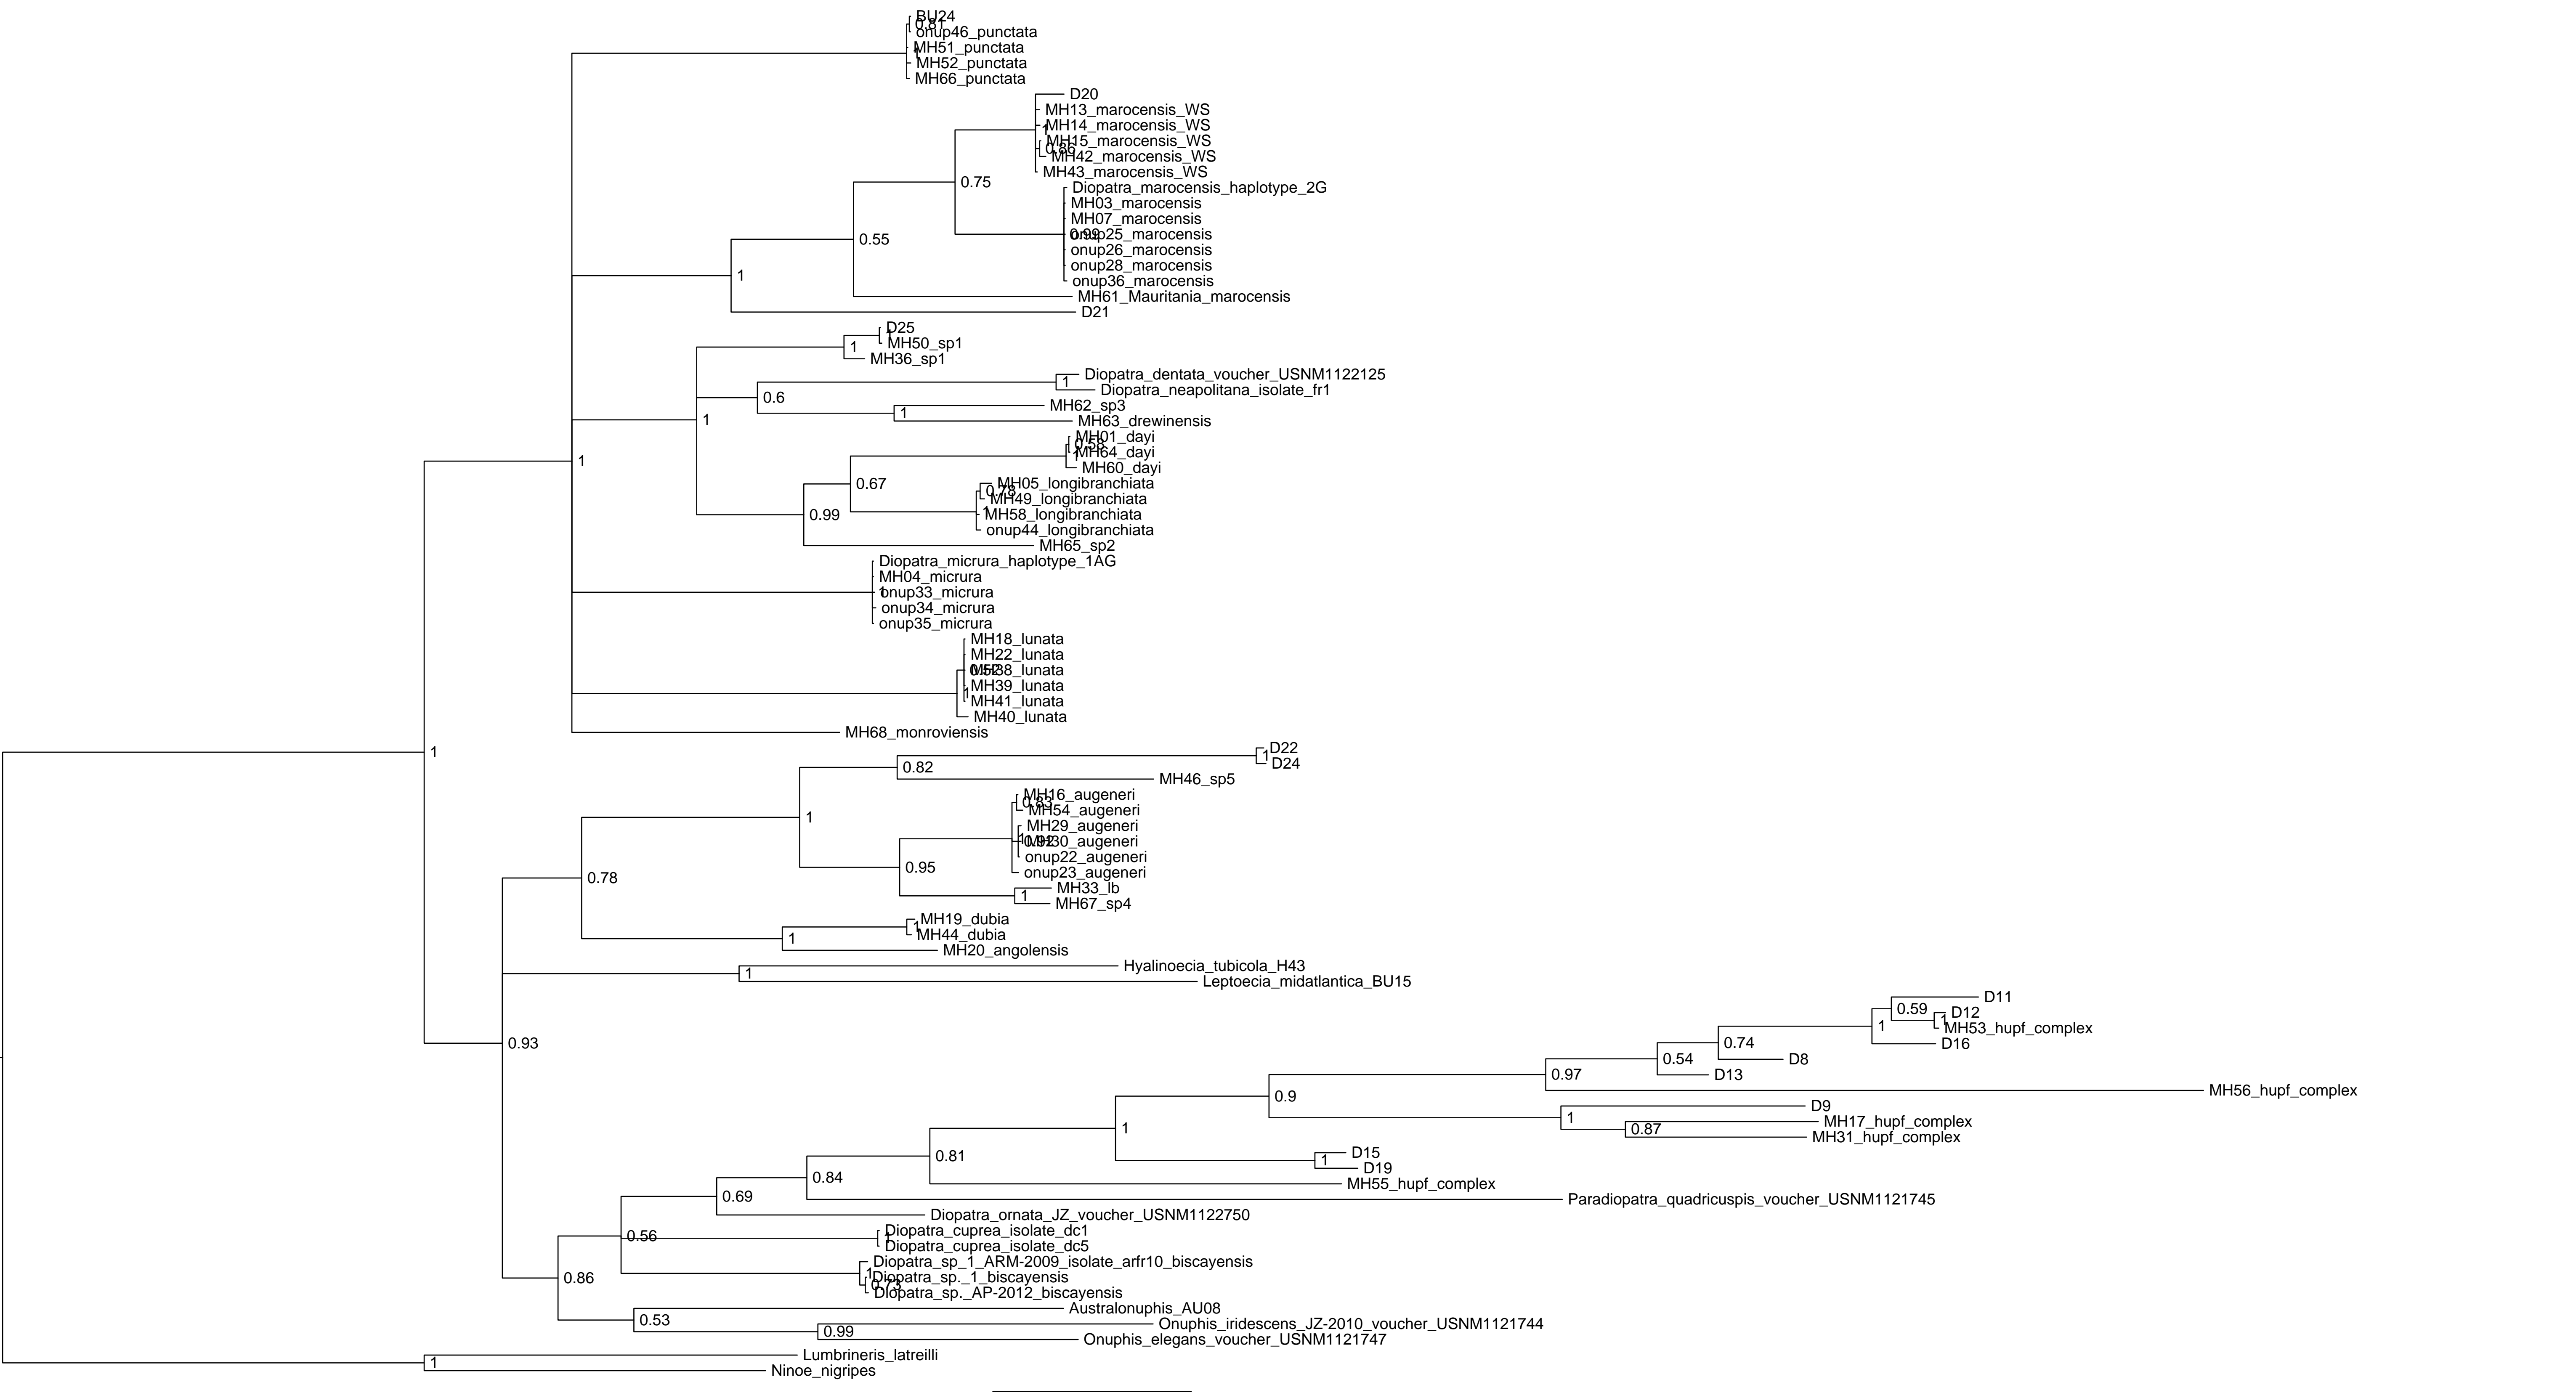

Supplement: s1 [file s1]

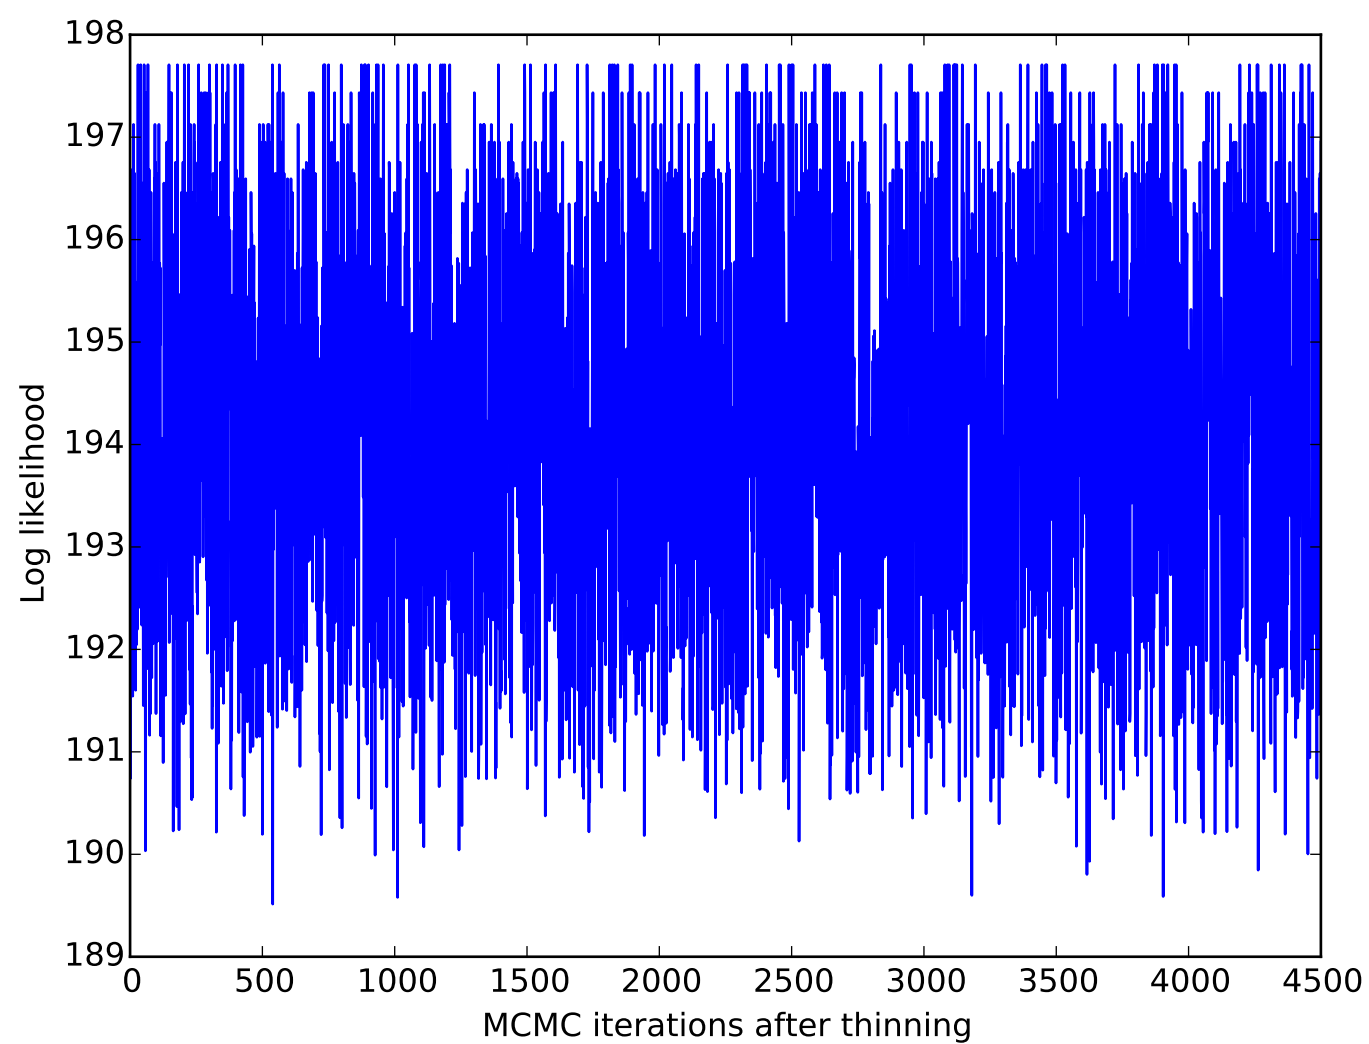

Supplement: s1 [file s1]

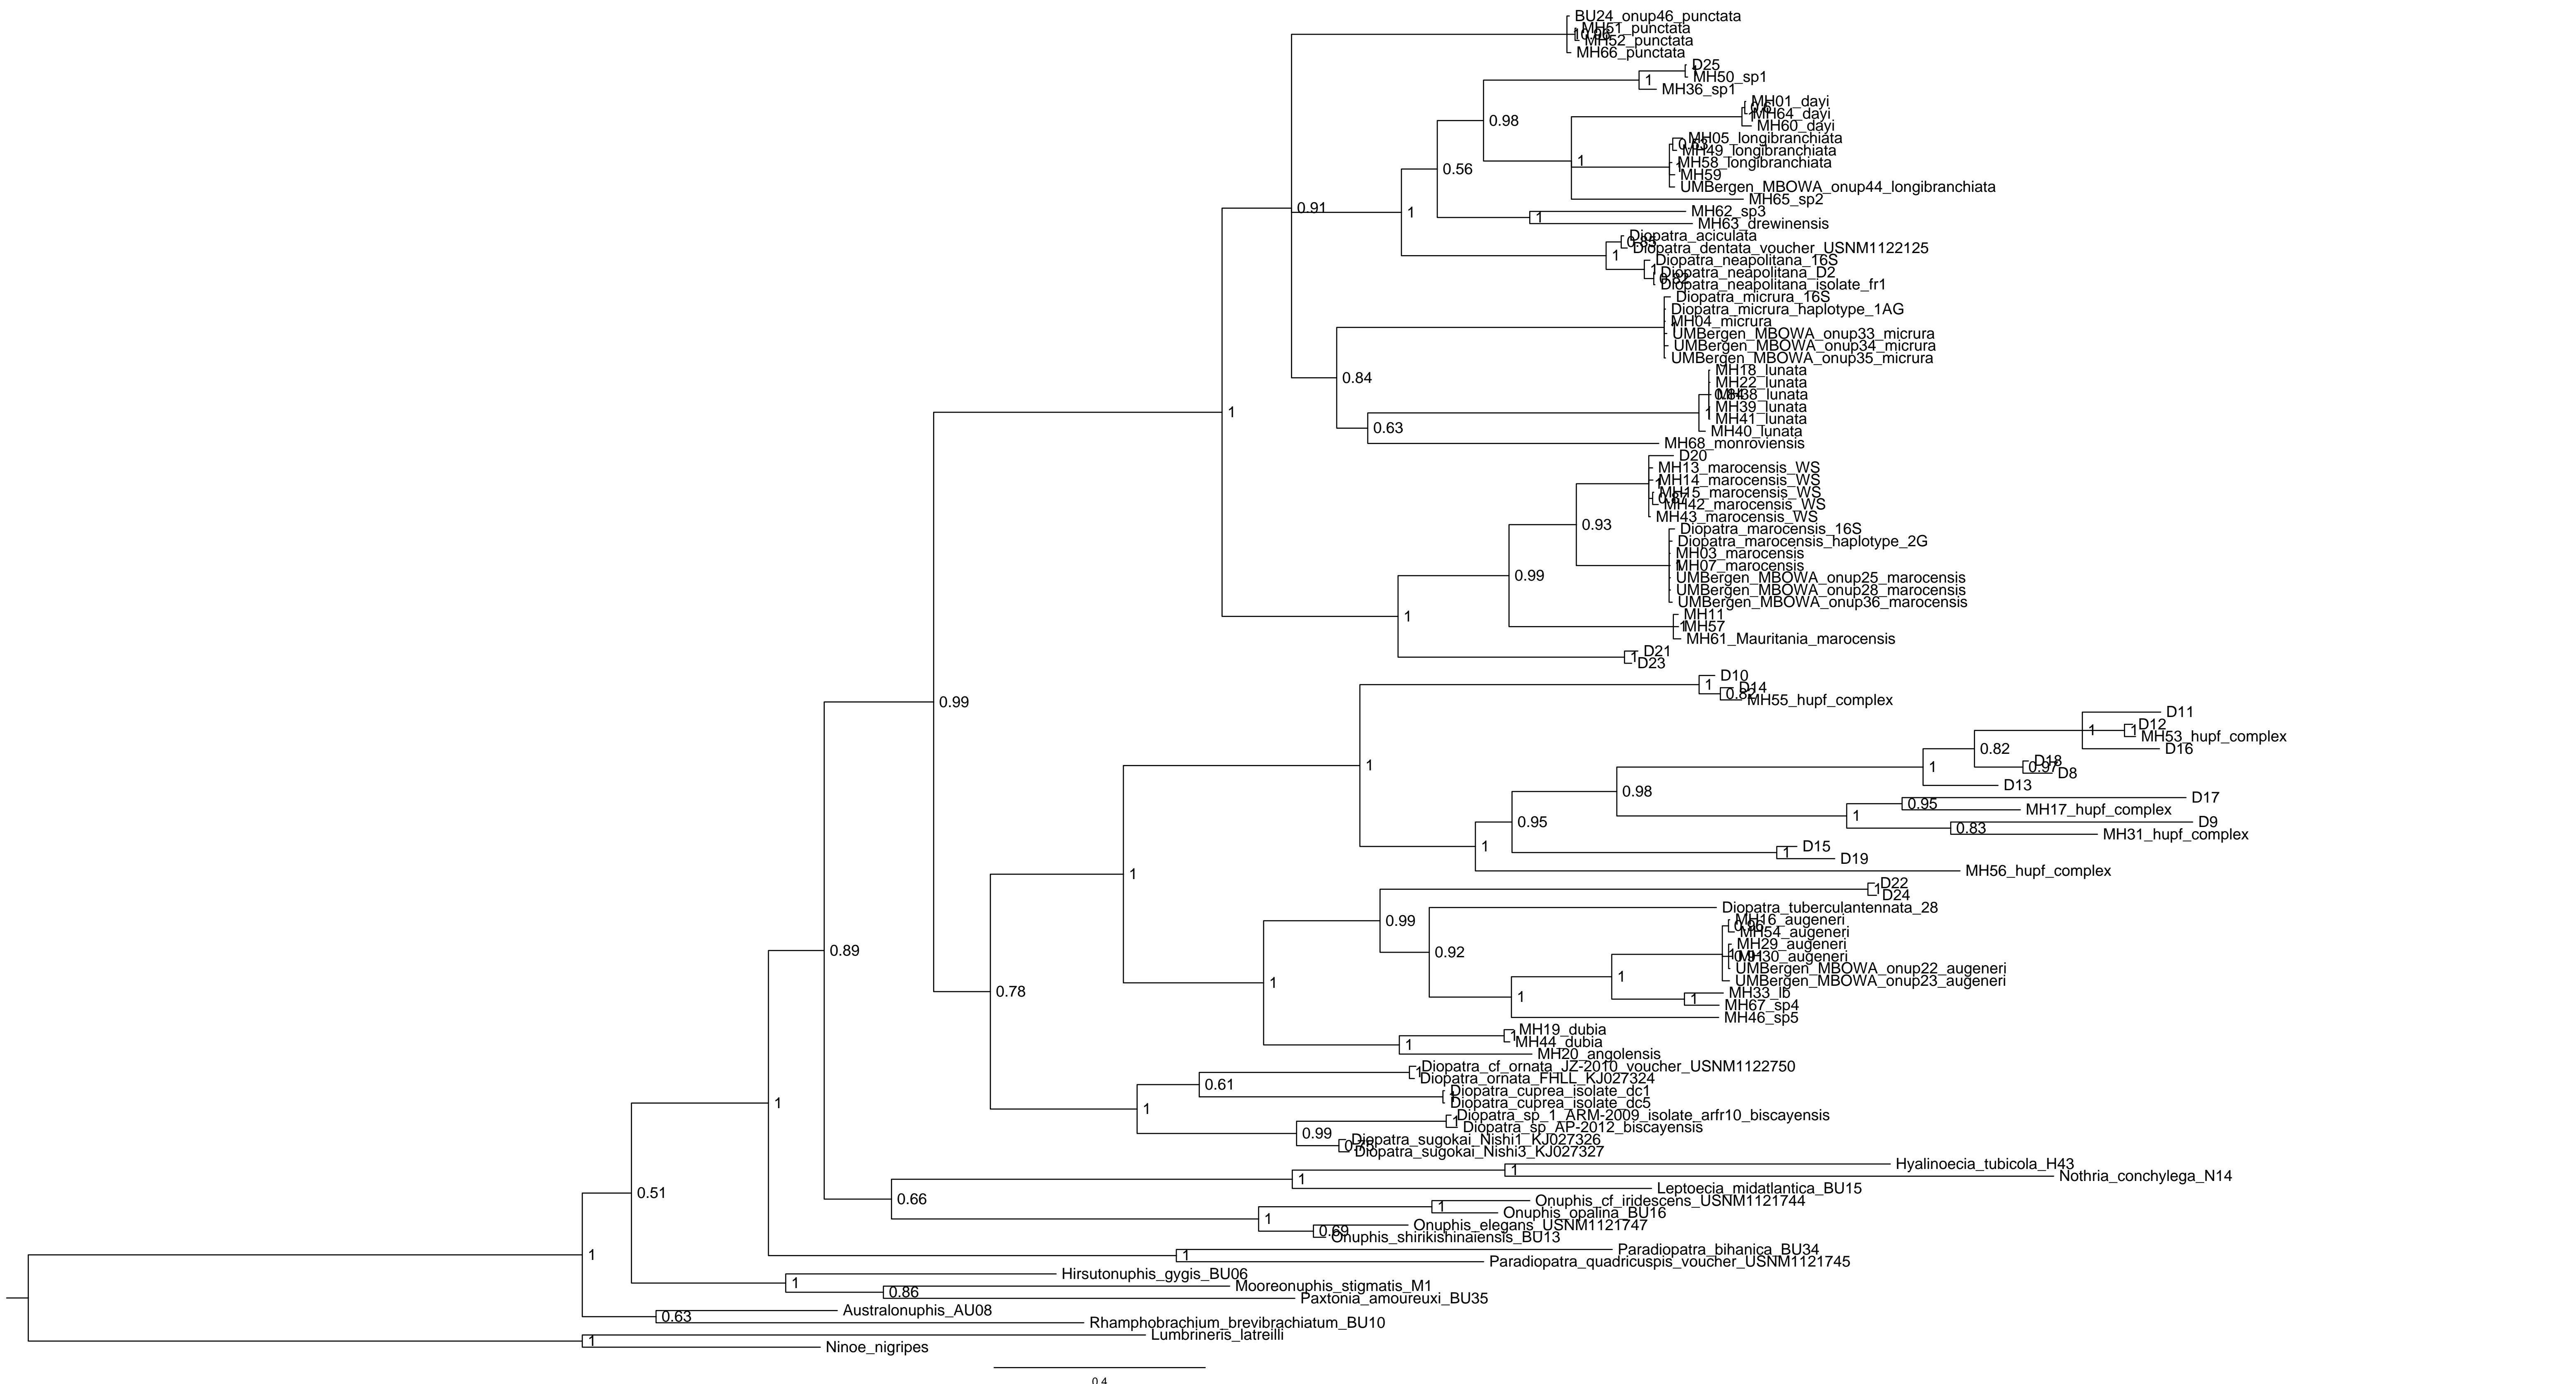

Supplement: s1 [file s1]

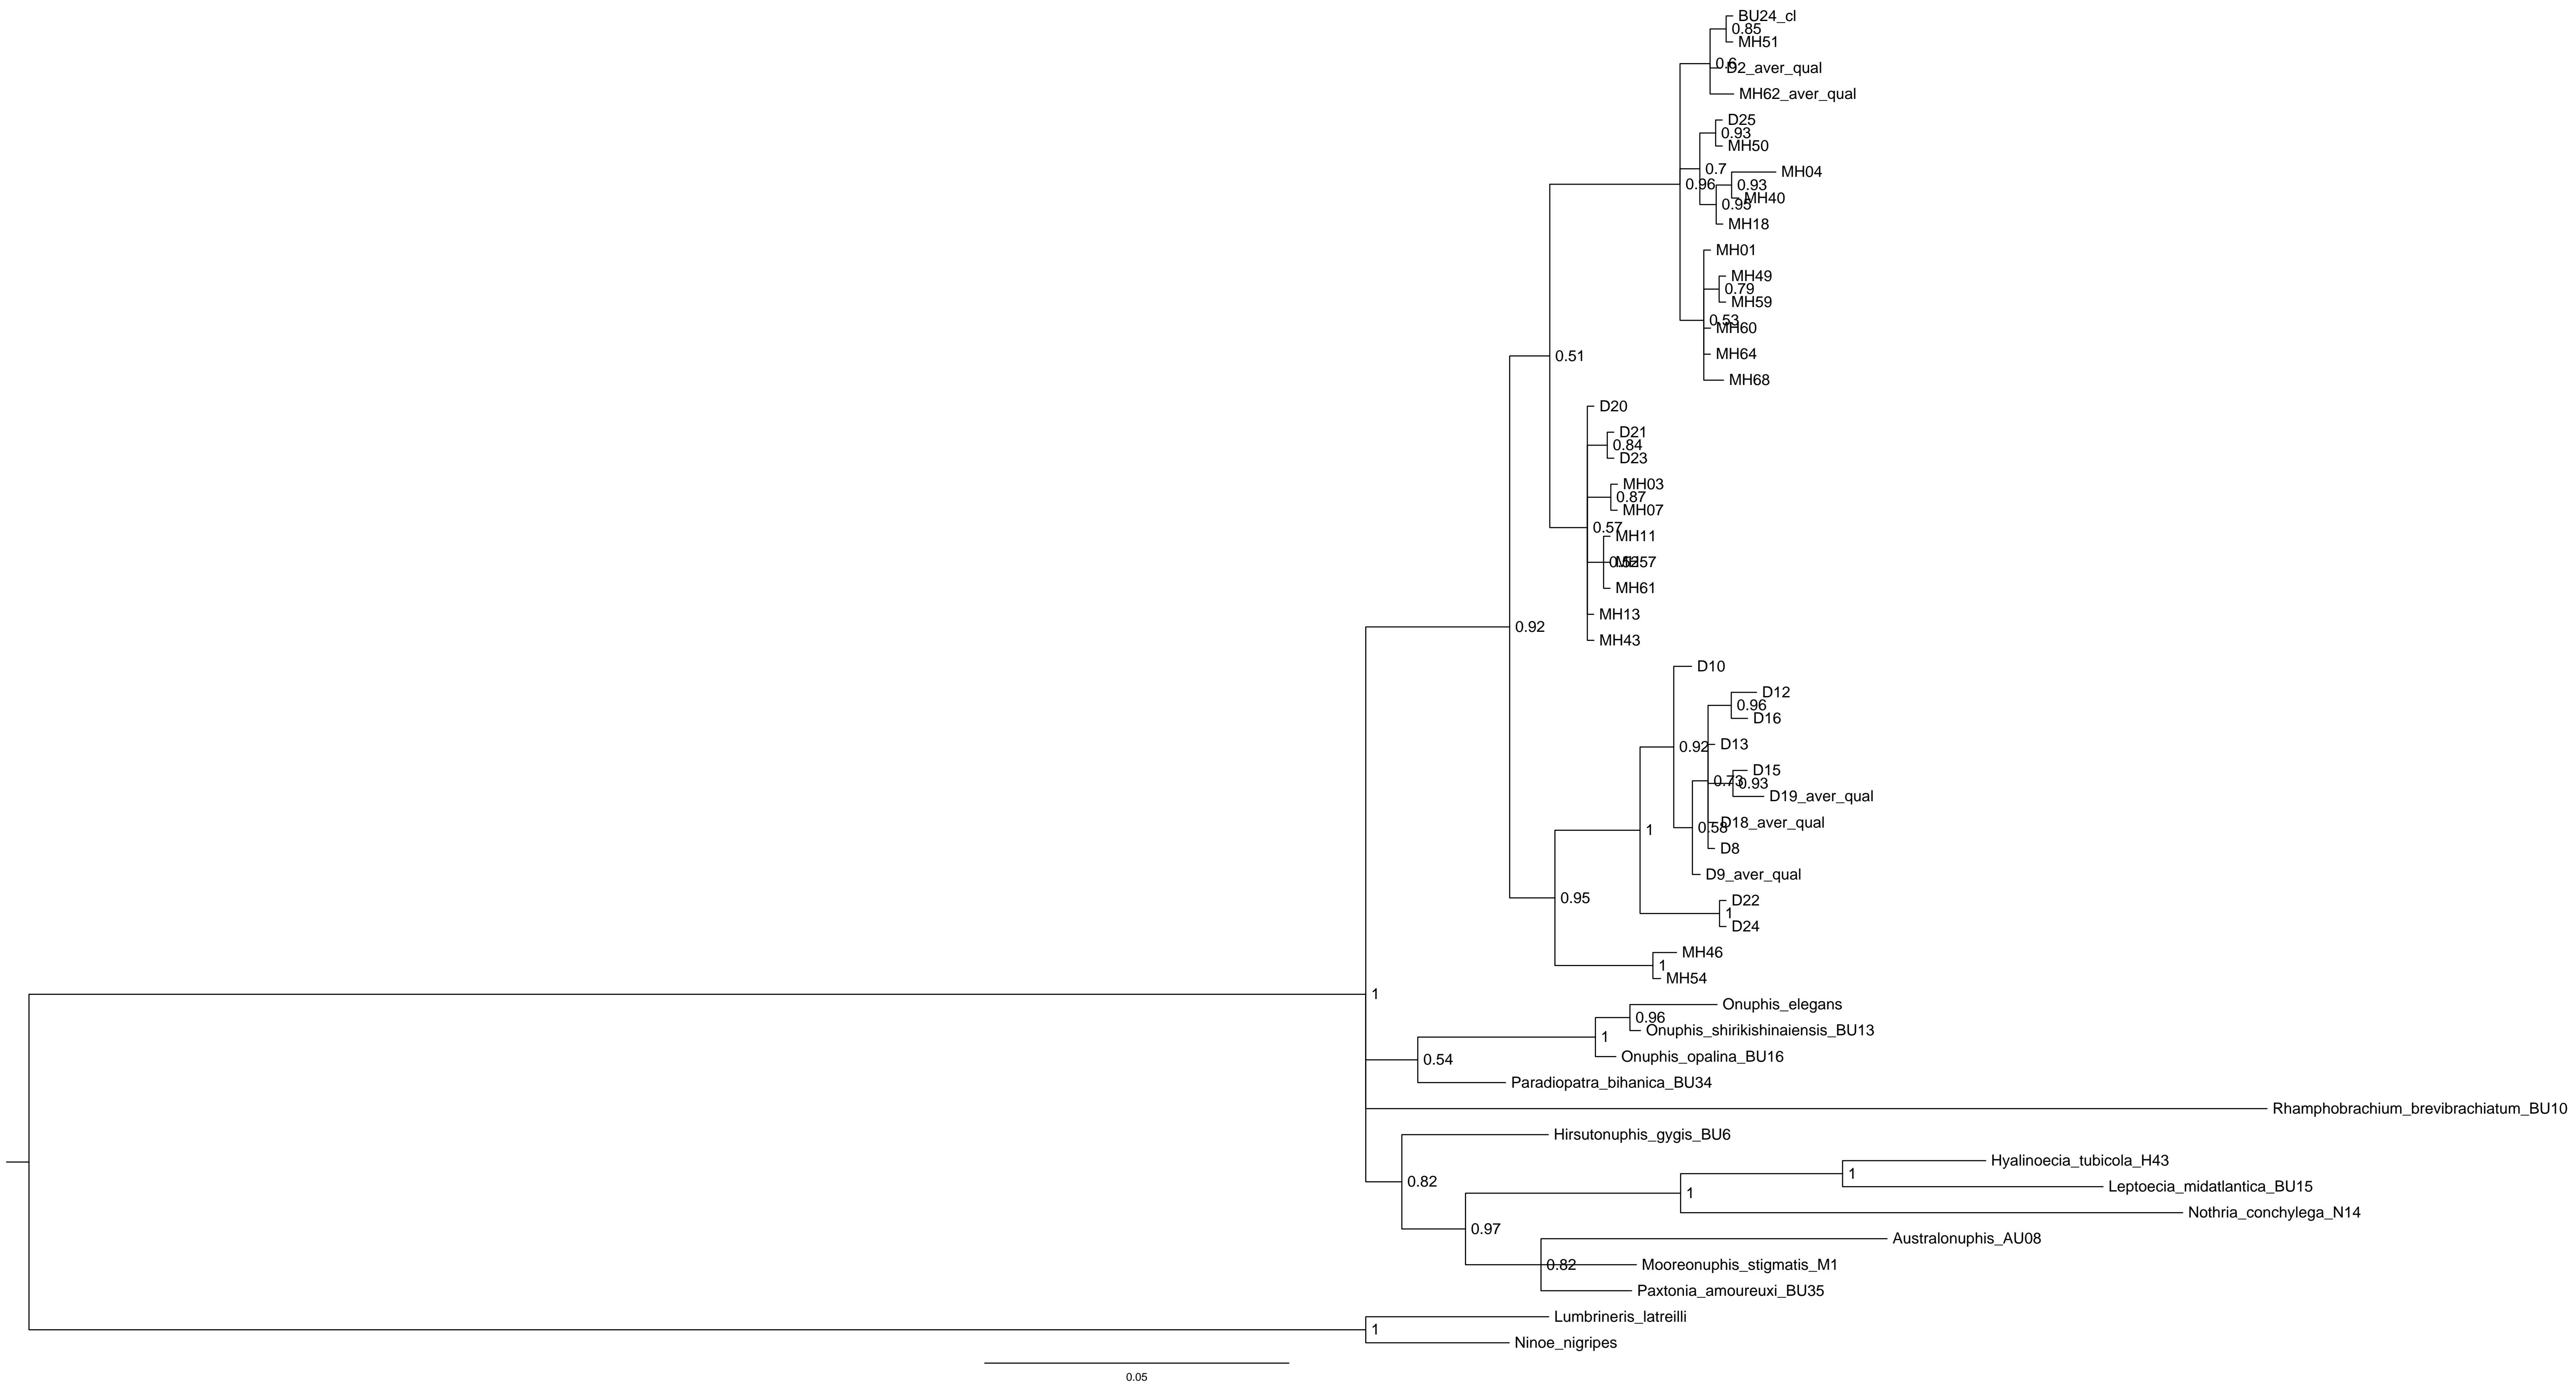

Supplement: s1 [file s1]

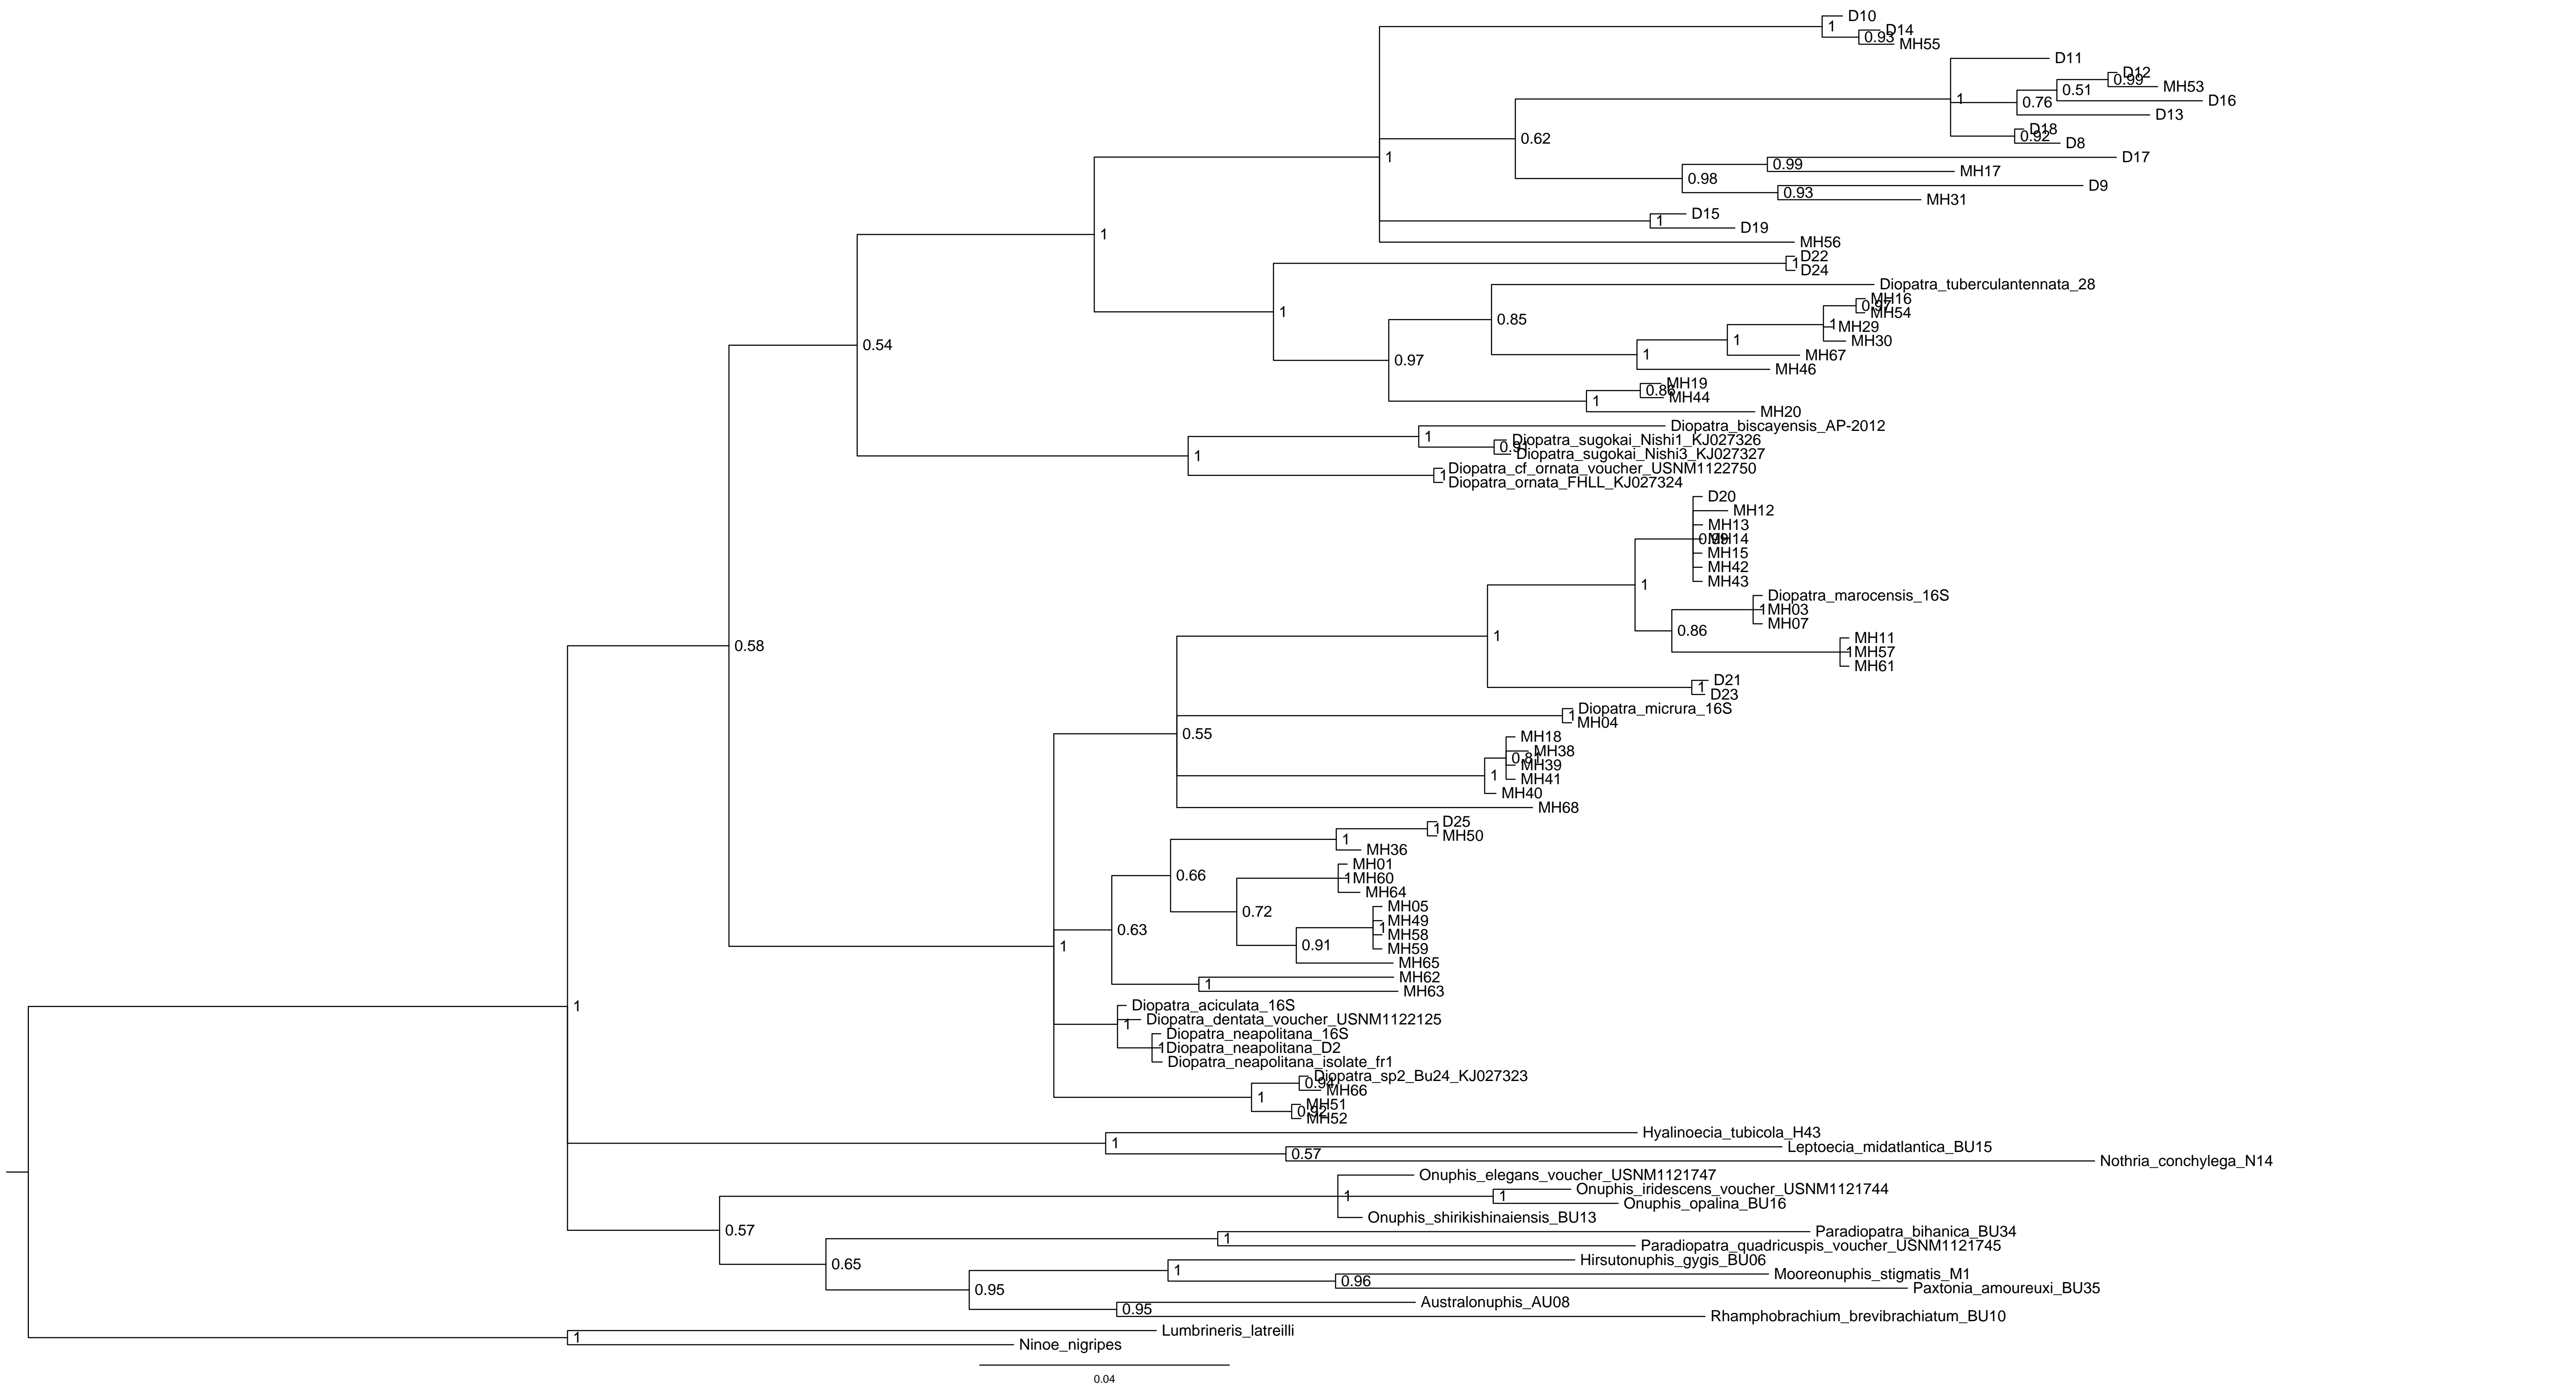

Supplement: s1 [file s1]
